# Supplementary material
Source: Springer Nature journal article supplement (https://www.springermedizin.de/resource/supplementary/13075_2004_1655_MOESM11_ESM.pdf/9690272)

CD27

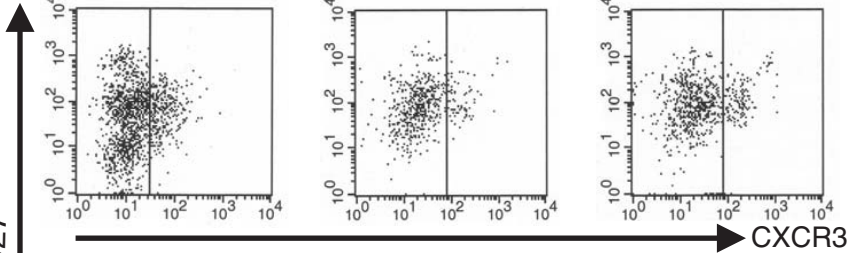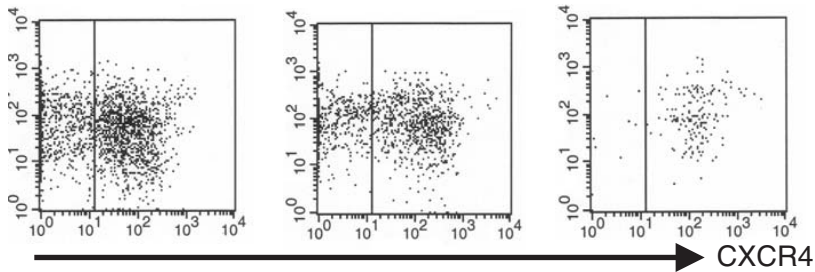

control

input

migrated

Supplement: MOESM11 [file 9690272]
